# Supplementary material for: PRDM8 reveals aberrant DNA methylation in aging syndromes and is relevant for hematopoietic and neuronal differentiation
Source: PubMed Central journal article supplement (PMC7439574; doi:10.1186/s13148-020-00914-5), 2020-08-20
Supplement: 13148_2020_914_MOESM1_ESM.pdf [file 13148_2020_914_MOESM1_ESM.pdf]

## Supplemental Data

*PRDM8* reveals aberrant DNA methylation in aging syndromes and is relevant for hematopoietic and neuronal differentiation

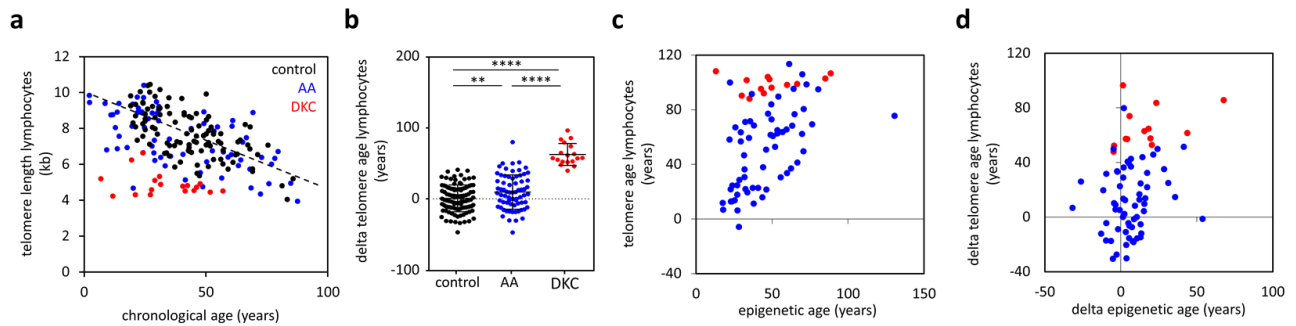

**Fig. S1: Telomere age of lymphocytes in dyskeratosis congenita and aplastic anemia.**

(a) Telomere lengths of 105 healthy donors (1), 70 aplastic anemia (AA) and 18 dyskeratosis congenita (DKC) patients measured in lymphocytes were correlated to chronological age (there are more samples than for granulocytes (Fig 1a), because telomere length in granulocytes was not always measured). DKC and AA patients show a reduced telomere length compared to healthy controls. (b) The difference between predicted telomere age and chronological age were higher for DKC and AA patients than for healthy controls. T-test: \*\*  $P < 0.001$ , \*\*\*  $P < 0.0001$ . (c,d) Telomere age and epigenetic age (c), as well as delta telomere age and delta epigenetic age (d) are not correlated.

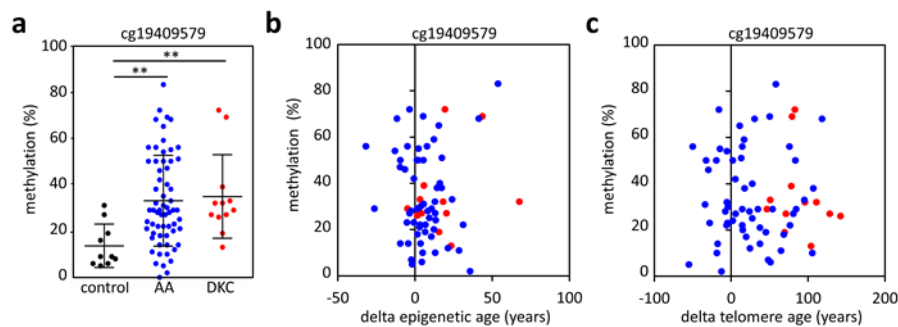

**Fig. S2: The CpG site cg19409579 in *PRDM8* is hypermethylated in AA DKC.**

(a) DNA methylation at the CpG site cg19409579 is significantly increased in 62 aplastic anemia (AA) and 12 dyskeratosis congenita (DKC), as compared to 10 healthy controls (2). T-test: \*\*  $P < 0.01$ . (b,c) DNA methylation in cg19409579 does not correlate to epigenetic age (b) or telomere age (c).

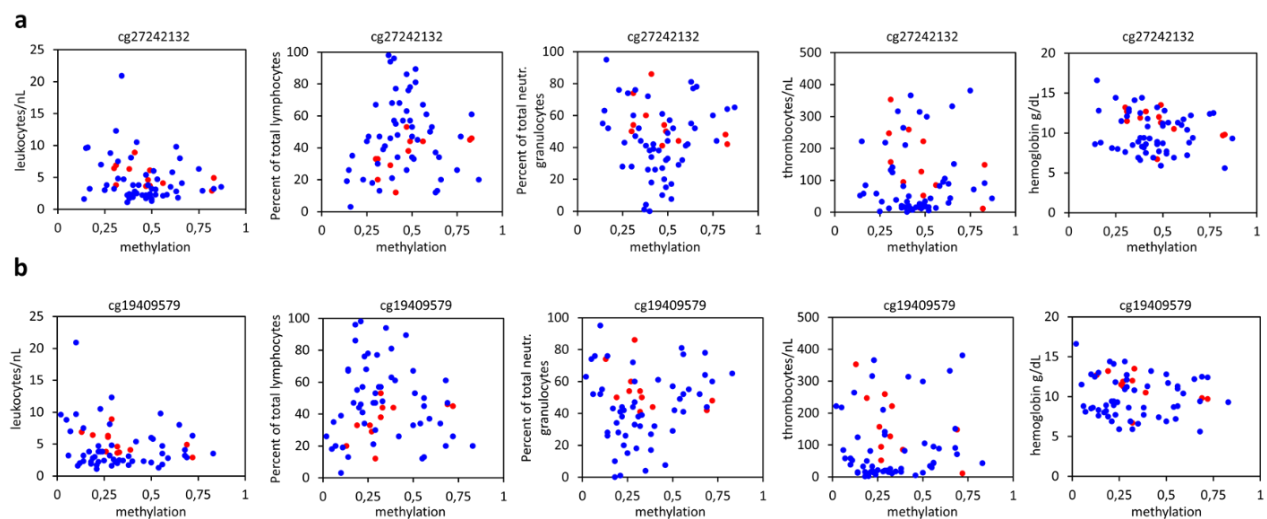

**Fig. S3: Aberrant DNA methylation in *PRDM8* is not correlated with blood counts.**

The DNA methylation levels in the two *PRDM8* associated CpGs (**a**: cg27242132; **b**: cg19409579) were analyzed in 56 aplastic anemia (AA) and 12 dyskeratosis congenita (DKC) patients in comparison to different blood counts (Blood counts were not available for all patient samples). There was no clear correlation.

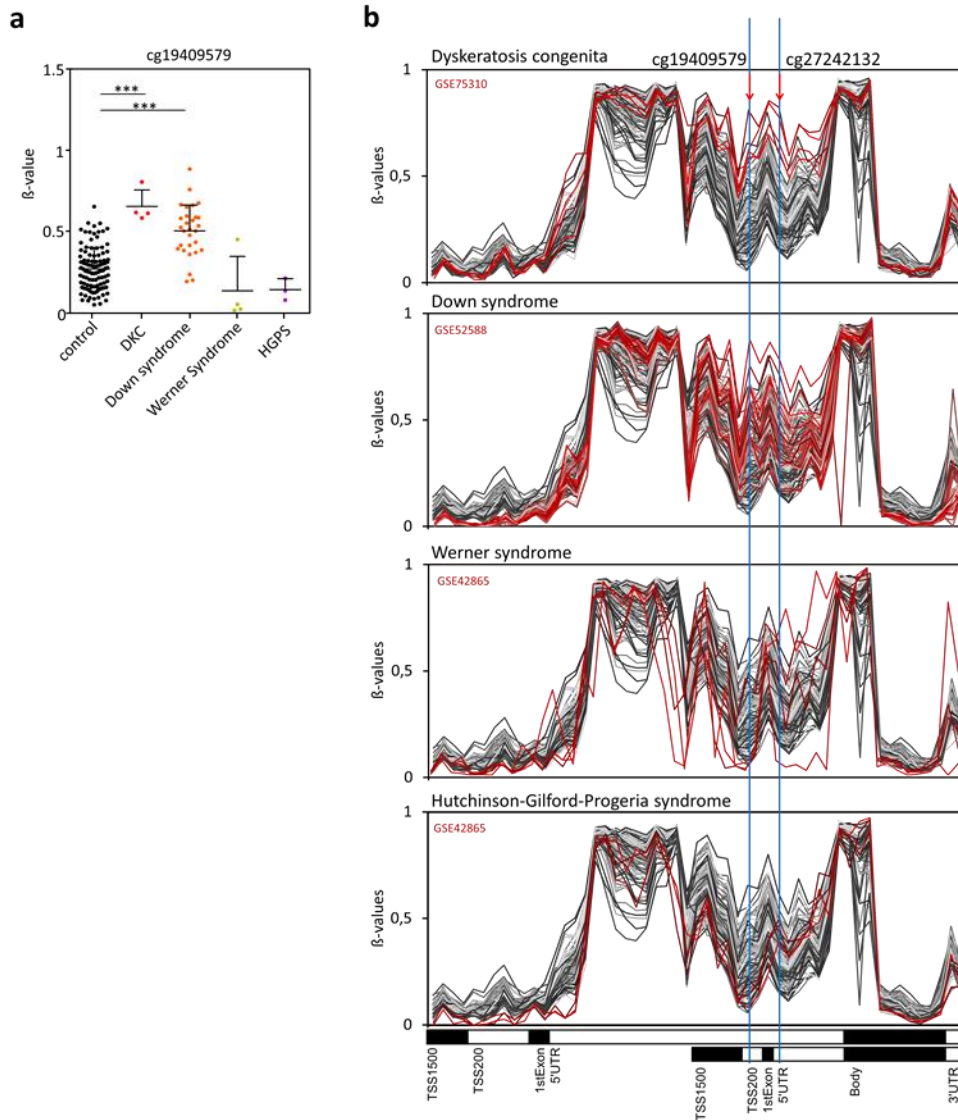

**Fig. S4: Aberrant DNA methylation patterns of *PRDM8* in premature aging diseases.**

**(a)** DNA methylation ( $\beta$ -values) at the *PRDM8* associated CpG site (cg19409579) in 103 healthy controls (GSE36054, GSE32148, GSE49064), 4 DKC samples (GSE75310), 29 Down syndrome samples (GSE52588), 4 Werner syndrome samples (GSE42865) and 3 Hutchinson-Gilford-Progeria Syndrome (HGPS) samples (GSE42865). T-test: \*\*\*  $P < 0.0001$ . **(b)** DNA methylation levels ( $\beta$ -values) at all CpG sites associated with *PRDM8* show hypomethylation in the promoter region of the long transcript (NM\_020226.3) and hypermethylation at the CpG sites cg19409579 and cg27242132 (position highlighted by the blue line) in the *PRDM8* gene in premature aging syndromes compared to healthy controls. Shown in grey are 103 healthy controls (GSE36054, GSE32148, GSE49064), shown in red are the diseased samples as mentioned above.

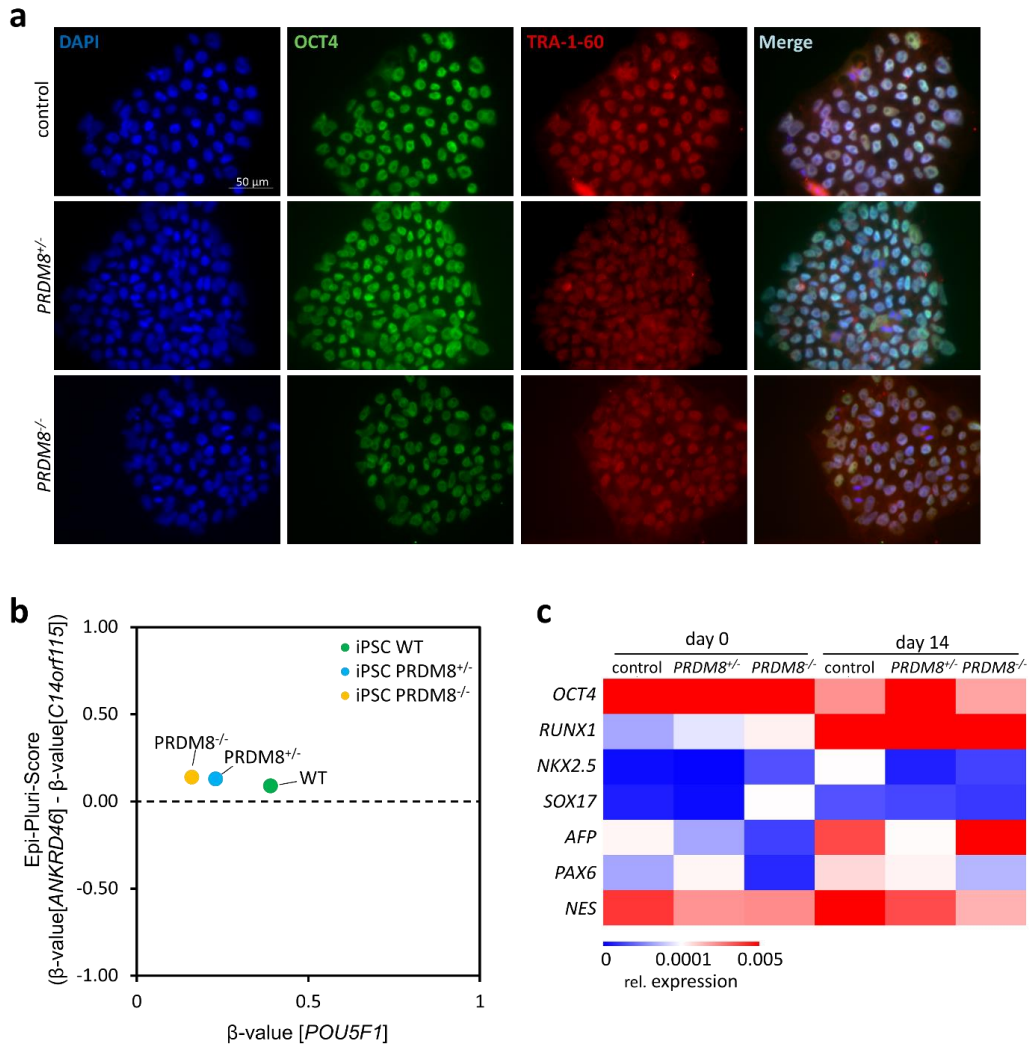

**Fig. S5: Characterization of *PRDM8* knockout induced pluripotent stem cells.**

**(a)** Immunofluorescence microscopy of induced pluripotent stem cells (iPSCs) for the pluripotency markers OCT4 and TRA-1-60. Nuclei were counterstained with DAPI. All clones are positive for both pluripotency markers. **(b)** To further validate pluripotency of the iPSC clones, we analyzed pluripotency associated CpGs by pyrosequencing to determine the Epi-Pluri-Score (3). All clones revealed positive Epi-Pluri-Score and hypomethylation in the *POU5F1* promoter, indicating that they were pluripotent. **(c)** Quantitative RT-PCR analysis of marker genes for ectodermal, mesodermal, and endodermal lineages was performed at day 0 (iPSCs) and after 14 days of differentiation in EBs. *OCT4* is used as a pluripotency marker, *PAX6* and *NES* as ectodermal markers, *SOX17* and *AFP* as endodermal markers, and *RUNX1* and *NKX2.5* as mesodermal markers. Color code depicts mean fold change *versus GAPDH*. Notably, upregulation of the neuronal markers nestin (*NES*) and paired box 6 (*PAX6*) is reduced in *PRDM8*<sup>+/-</sup> and *PRDM8*<sup>-/-</sup>.

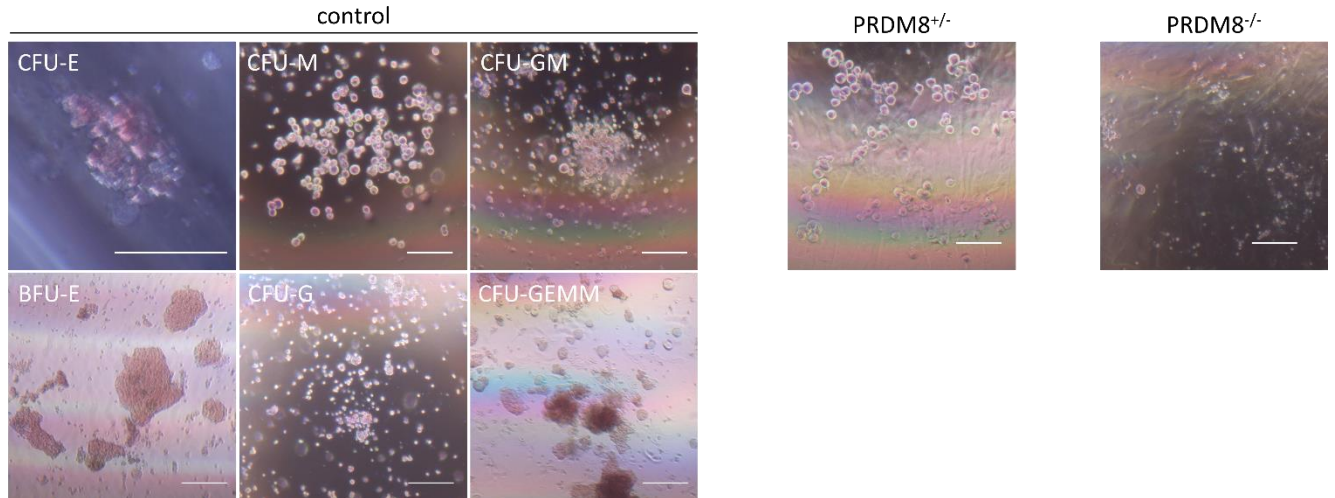

**Fig. S6: Colony forming unit assay of iPSC-derived hematopoietic progenitor cells.**

Representative phase contrast pictures of colony forming units (CFUs) of control iPSCs with typical morphology. Knockout clones show impaired differentiation with no CFU colonies in *PRDM8*<sup>-/-</sup> and only few CFU-M in *PRDM8*<sup>+/-</sup>. CFU-E: Colony Forming Unit Erythroid; BFU-E: Burst Forming Unit Erythroid; CFU-M: Colony Forming Unit Macrophage; CFU-G: Colony Forming Unit Granulocyte; CFU-GM: Colony Forming Unit Granulocyte, Macrophage; CFU-GEMM: Colony Forming Unit Granulocyte, Erythrocyte, Macrophages, Megakaryocyte. Scale bar: 200  $\mu$ m.

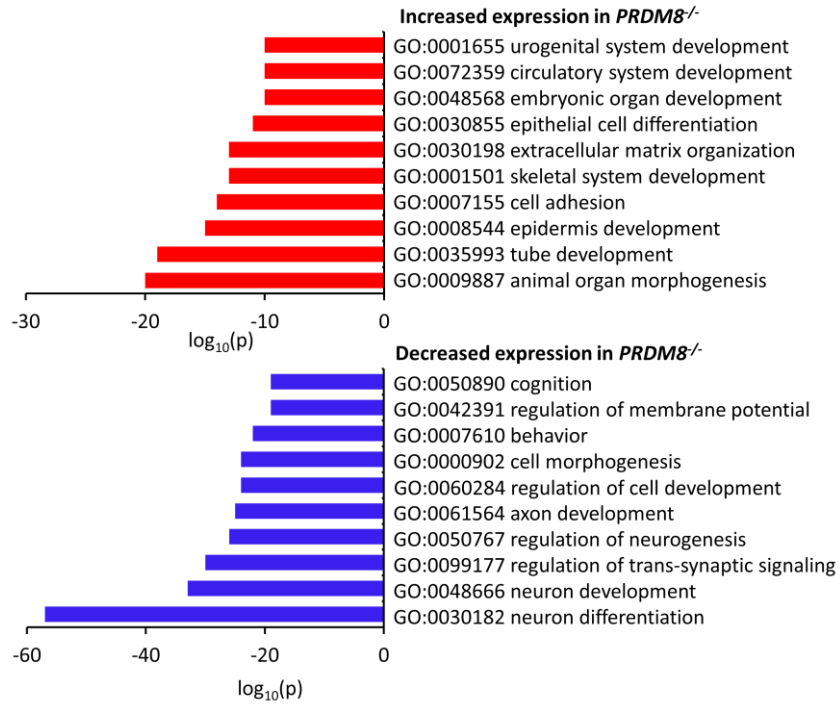

**Fig. S7: Gene ontology analysis after neuronal differentiation.**

Gene ontology analysis of genes with at least four-fold differential expression ( $\log_2 \text{FC} > 2$  or  $< -2$ ) in knockout *versus* control cells revealed enrichment in cell adhesion or developmental processes and decreased representation of genes for neural activity in *PRDM8*<sup>-/-</sup> clones.

**PRDM8-1 (chr4:80,197,876-80,198,069)**

TTCTTGAGGGGCTGTCTACTGCCAGTAATATTGTACAAAAGGAGGAGCGGGTGGTGAGCACTTTGCCCGGAG  
AAGCCGGGAGACTGGGGAGCGCGCGGCCGCCAGACAATGCCTGCCTAGAGGGA<sup>48</sup>CGGGCCAGTGGCGGGCA<sup>67</sup>  
GCAGCGACCGGCTTTTCAGAAAGCCCCCGCGGCTCTGGGGTATATTCCCAGGGCA<sup>76</sup>  
<sup>145</sup> <sup>149</sup> <sup>90</sup> <sup>92</sup> <sup>94</sup> <sup>98</sup> <sup>124</sup> <sup>135</sup>

**PRDM8-2 (chr4:80,197,190-80,197,431)**

GGGAAAGGCCCTCTCCAATCATTTTGGTACCTTCCTTTCCAATCCTGAAA<sup>52</sup>CGATTTTCCCCTCCTAGCAGTC  
CCAGAGGGCCCGAGCTTTAGGAGGAGGCGGGCCGGGA<sup>84</sup>CGCTCTCTGAGAGGCGTTGCCACCCGGGGTAG<sup>101</sup> <sup>106</sup> <sup>111</sup> <sup>125</sup> <sup>135</sup>  
CGCTCAGGATCTGCGGGGCGCGGGCAGGCCCGGGGAAAAAGCTGCGAGGCAGGCGGCGCGGAGGGA<sup>144</sup>  
<sup>144</sup> <sup>157</sup> <sup>162</sup> <sup>164</sup> <sup>173</sup> <sup>188</sup> <sup>197</sup> <sup>200</sup> <sup>203</sup>  
CGCCTGGCCCAGCAAAGAGTTAAAGGGAGGG<sup>212</sup>

**Fig. S8: Genomic regions for the BBA-seq assays within *PRDM8*.**

Sequences for two genomic regions of *PRDM8* (assay 1 and assay 2) that were analyzed by bisulfite barcoded amplicon sequencing (BBA-seq) are depicted and all CpG sites are highlighted in red. The CpGs are indicated by their ordering number in the sequences. The underlined CpGs are cg27242132 and cg19409579.

## Supplemental Tables

### Table S1: Differentially expressed genes in *PRDM8*<sup>-/-</sup> versus control

This table is provided as Additional File 2

### Table S2: Differentially methylated CpG sites in *PRDM8*<sup>-/-</sup> versus control

This table is provided as Additional File 3

### Table S3: Patient data of all DKC, AA samples and healthy controls

This table is provided as Additional File 4

### Table S4: Primers used for pyrosequencing of the epigenetic aging signature.

| Primer     | Sequence (5' – 3')          |
|------------|-----------------------------|
| ASPA Fw    | biotin-ATTATTTGGTCAAATGATT  |
| ASPA Rv    | CAACCCTATTCTCTAAATCTC       |
| ASPA seq   | CCCTATTCTCTAAATCTCA         |
| ITGA2B Fw  | biotin-TAATTTTTTTTTGGGTGATG |
| ITGA2B Rv  | ACCAAAAATAACAATATACTCAAT    |
| ITGA2B seq | CAATATACTCAATACTATACT       |
| PDE4C Fw   | AGGTTTGTAGTAGGTTGAG         |
| PDE4C Rv   | biotin-AACTCAAATCCCTCTC     |
| PDE4C seq  | GTTATAGTATGATTAGAGTTT       |

### Table S5: Primers for bisulfite barcoded amplicon sequencing of *PRDM8*

| Primer     | Sequence (5' – 3')                                      |
|------------|---------------------------------------------------------|
| PRDM8-1 Fw | CTCTTTCCCTACACGACGCTCTTCCGATCTTTTTGAGGGGTTGTTTATTGTTAGT |
| PRDM8-1 Rv | CTGGAGTTCAGACGTGTGCTCTTCCGATCTTACCCTAAAAATATACCCCAAACC  |
| PRDM8-2 Fw | CTCTTTCCCTACACGACGCTCTTCCGATCTGGGGAAAGTTTTTTTTAATTATTTT |
| PRDM8-2 Rv | CTGGAGTTCAGACGTGTGCTCTTCCGATCTCCCTCCCTTAACTCTTTACTAAACC |



**Table S6: Quantitative RT-PCR primers used for *PRDM8* gene expression analysis.**

| Primer           | Sequence (5' – 3')    |
|------------------|-----------------------|
| NM020226.3 Fw    | ACGAGCAAATGCGATCTCTG  |
| NM020226.3 Rv    | ATGCTTCCCAGGCTGATTTGA |
| NM001099403.2 Fw | TCTCCCATCTCTCCATCTC   |
| NM001099403.2 Rv | GATGCCAGTATCCTCCATCA  |
| PRDM8_all Tr. Fw | ACCAGCGTTTACACCACCTG  |
| PRDM8_all Tr. Rv | CCATTTGCTGCTGAGGTGTC  |
| GAPDH Fw         | GAAGGTGAAGGTCGGAGTC   |
| GAPDH Rv         | GAAGATGGTGATGGGATTC   |

**Table S7: Guide RNAs used for creating CRISPR knockouts of *PRDM8* in iPSCs.**

| Primer      | Sequence (5' – 3')        |
|-------------|---------------------------|
| PRDM8 1a Fw | AAACTCTTGTAGGCTGCAGAGAAAC |
| PRDM8 1a Rv | CACCGTTTCTCTGCAGCCTACAAGA |
| PRDM8 1b Fw | CACCGTTAGCTGACACAGAATTAG  |
| PRDM8 1b Rv | AAACCTAATTCTGTGTCAGCTAACC |
| PRDM8 2a Fw | AAACGCGTTTACACCACCTGCGACC |
| PRDM8 2a Rv | CACCGTTCGCAGGTGGTGTAACGC  |
| PRDM8 2b Fw | CACCGATCCCTGAGAATGCTATATT |
| PRDM8 2b Rv | AAACAATATAGCATTCTCAGGGATC |

**Table S8: Quantitative RT-PCR primers used for analysis of embryoid body assays.**

| Primer    | Sequence (5' – 3')        |
|-----------|---------------------------|
| AFP Fw    | GCCAAGCTCAGGGTGTAG        |
| AFP Rv    | CAATGACAGCCTCAAGTTGT      |
| Nav1.7 Fw | CACAATCCCAGCCTCACAGT      |
| Nav1.7 Rv | CTGAGGAGCTTGACCGGTTTA     |
| NEFH Fw   | CGACATTGCCTCCTACCAG       |
| NEFH Rv   | TCCGACACTCTTCACCTTC       |
| NES Fw    | CCTCAAGATGTCCCTCAGCC      |
| NES Rv    | CCAGCTTGGGGTCCTGAAAG      |
| NXK2.5 Fw | ACCTCAACAGCTCCCTGACTCT    |
| NXK2.5 Rv | ATAATCGCCGCCACAACTCTCC    |
| OCT4 Fw   | GGGGTTCTATTTGGGAAGGTA     |
| OCT4 Rv   | ACCCACTTCTGCAGCAAGGG      |
| PAX6 Fw   | CAGACACAGCCCTCACAAAC      |
| PAX6 Rv   | TCATAACTCCGCCCATTCAC      |
| PRDM8 Fw* | ACCGTATATCTTTTCGGGTAGACA  |
| PRDM8 Rv  | CTAGAGGGGCAGAGCAAGAG      |
| RUNX1 Fw  | CCGAGAACCTCGAAGACATC      |
| RUNX1 Rv  | GTCTGACCCTCATGGCTGT       |
| SOX1 Fw   | CCTGTGTGTACCCTGGAGTTTCTGT |
| SOX1 Rv   | TGCACGAAGCACCTGCAATAAGATG |
| TAC1 Fw   | CACAATCCCAGCCTCACAGT      |
| TAC1 Rv   | CAAAGAACTGCTGAGGCTTG      |

\* Primer anneals to the deleted region in the *PRDM8* transcript.

### Supplemental References

1. Weidner CI, Lin Q, Koch CM, Eisele L, Beier F, Ziegler P, et al. Aging of blood can be tracked by DNA methylation changes at just three CpG sites. *Genome Biol.* 2014;15(2):R24.
2. Weidner CI, Lin Q, Birkhofer C, Gerstenmaier U, Kaifie A, Kirschner M, et al. DNA methylation in *PRDM8* is indicative for dyskeratosis congenita. *Oncotarget.* 2016;7(10):10765-72.
3. Lenz M, Goetzke R, Schenk A, Schubert C, Veeck J, Hemeda H, et al. Epigenetic biomarker to support classification into pluripotent and non-pluripotent cells. *Sci Rep.* 2015;5:8973.
